# Supplementary material for: Arginase-2-specific cytotoxic T cells specifically recognize functional regulatory T cells
Source: PubMed Central journal article supplement — J Immunother Cancer. 2022 Oct 31;10(10):e005326. doi: 10.1136/jitc-2022-005326 (PMC9628693; doi:10.1136/jitc-2022-005326), 2022-10-31
Supplement: jitc-2022-005326supp009.pdf [file jitc-2022-005326supp009.pdf]

## Arginase-2 specific cytotoxic T cells specifically recognize functional regulatory T cells

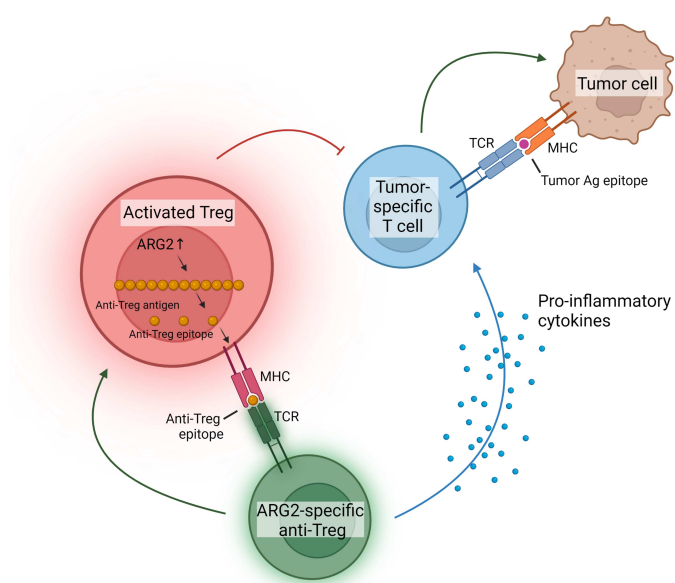

### Authors

Stine Emilie Weis-Banke<sup>†</sup>, Thomas Landkildehus Lisle<sup>†</sup>, María Perez-Penco, Aimilia Schina, Mie Linder Hübbe, Majken Siersbæk, Morten Orebo Holmström, Mia Aaboe Jørgensen, Inge Marie Svane, Özcan Met, Niels Ødum, Daniel Hargbøl Madsen, Marco Donia, Lars Grøntved and Mads Hald Andersen

### Correspondance

mads.hald.andersen@regionh.dk

### In brief

Activated regulatory T cells (Tregs) express significant levels of arginase-2 (ARG2) and were specifically recognized by cytotoxic CD8<sup>+</sup> T cells specific towards an ARG2-derived epitope, leading to a proinflammatory cytokine response. As such, these anti-regulatory T cells (anti-Tregs) could modulate the immunosuppressive tumor microenvironment and enhance anti-tumor immune responses.

<sup>†</sup>These authors contributed equally.
