# Supplementary material for: Arginase-2-specific cytotoxic T cells specifically recognize functional regulatory T cells
Source: PubMed Central journal article supplement — J Immunother Cancer. 2022 Oct 31;10(10):e005326. doi: 10.1136/jitc-2022-005326 (PMC9628693; doi:10.1136/jitc-2022-005326), 2022-10-31
Supplement: jitc-2022-005326supp010.pdf [file jitc-2022-005326supp010.pdf]

| SHORT PEPTIDE LIBRARY:<br>HLA-A2 PREDICTED ARG2-DERIVED PEPTIDES |               |                                    |                      |                               |
|------------------------------------------------------------------|---------------|------------------------------------|----------------------|-------------------------------|
| PEPTIDE NAME                                                     | POSITION (AA) | SEQUENCE                           | PREDICTION ALGORITHM | SCORE (SYFP) OR RANK (NETMHC) |
| A2S1                                                             | 2-10          | SLRGSLRSL                          | SYFP & NetMHC        | 28 (SYFP) and 1.10 (NetMHC)   |
| A2S2                                                             | 10-18         | LLQTRVHSI                          | SYFP                 | 27                            |
| A2S3                                                             | 18-26         | ILKKS SVHSV                        | SYFP & NetMHC        | 28 and 1.50                   |
| A2S4                                                             | 53-61         | GLMKRLSSL                          | SYFP & NetMHC        | 28 and 0.250                  |
| A2S5                                                             | 84-92         | NLIVNPRSV                          | SYFP                 | 24                            |
| A2S6                                                             | 94-102        | LANQELAEV                          | SYFP                 | 25                            |
| A2S7                                                             | 114-122       | VTLGGDHSL                          | SYFP                 | 24                            |
| A2S8                                                             | 166-175       | FLLRELQDKV                         | NetMHC               | 0.400                         |
| A2S9                                                             | 167-175       | LLRELQDKV                          | SYFP                 | 27                            |
| A2S10                                                            | 170-178       | ELQDKVPQL                          | SYFP                 | 24                            |
| A2S11                                                            | 193-201       | IVYIGLRDV                          | SYFP                 | 23                            |
| A2S12                                                            | 229-237       | KVMERTFDL                          | NetMHC               | 0.400                         |
| A2S13                                                            | 278-286       | YIAEEIHNT                          | SYFP & NetMHC        | 23 and 1.10                   |
| A2S14                                                            | 287-295       | GLLSALDLV                          | SYFP & NetMHC        | 27 and 0.125                  |
| A2S15                                                            | 288-297       | LLSALDLVEV                         | SYFP & NetMHC        | 0.300                         |
| OTHER PEPTIDES (ARG2 and ARG1, both human and murine)            |               |                                    |                      |                               |
| PEPTIDE NAME                                                     | POSITION (AA) | SEQUENCE                           |                      |                               |
| A2L2                                                             | 2-34          | SLRGSLRLLQTRVHSILKKS SVHSVAVIGAPFS |                      |                               |
| ARG1_65-73                                                       | 65-73         | QIVKNPRSV                          |                      |                               |
| Murine ARG2                                                      | 188-196       | LSPPNIVYI                          |                      |                               |
| Murine ARG1                                                      | 169-177       | ISAKDIVYI                          |                      |                               |

**Supplementary Table S1: ARG2-derived short peptides predicted for binding to HLA-A2**AA = amino acid ; SYFP = SYFPEITHI<sup>38</sup>, available at [www.syfpeithi.de](http://www.syfpeithi.de) ; NetMHC<sup>39,40</sup>, available at [cbs.dtu.dk](http://cbs.dtu.dk)
