# Supplementary material for: Arginase-2-specific cytotoxic T cells specifically recognize functional regulatory T cells
Source: PubMed Central journal article supplement — J Immunother Cancer. 2022 Oct 31;10(10):e005326. doi: 10.1136/jitc-2022-005326 (PMC9628693; doi:10.1136/jitc-2022-005326), 2022-10-31
Supplement: jitc-2022-005326supp011.pdf [file jitc-2022-005326supp011.pdf]

| LIST OF ANTIBODIES           |               |                                         |                     |
|------------------------------|---------------|-----------------------------------------|---------------------|
| TARGET                       | FLUORO-CHROME | CLONE, CATALOG NUMBER, MANUFACTURER     | APPLICATION         |
| CD3                          | APC-H7        | SK7, 641415, BD                         | ICS, Treg isolation |
| CD4                          | FITC          | SK3, 345768, BD                         | ICS                 |
| CD8                          | PerCP         | SK1, 345774, BD                         | ICS                 |
| CD107a                       | PE            | H4A3, 560948, BD                        | ICS                 |
| IFN $\gamma$                 | APC           | 25723.II, 341117, BD                    | ICS                 |
| TNF $\alpha$                 | BV421         | MAB11, 562783, BD                       | ICS                 |
| Dead cell marker*            | BV510         | N/A, 564406, BD                         | Viability           |
| HLA-A02                      | PE            | BB7.2, 558570, BD                       | HLA-typing          |
| HLA-ABC                      | FITC          | DX17, 560168, BD                        | HLA-typing          |
| HLA-B8                       | PE            | REA145, 130-119-137, Miltenyi Biotech   | HLA-typing          |
| CD4                          | PerCP         | SK3, 566924, BD                         | Treg isolation      |
| CD25                         | Pe-Cy7        | M-A251, 557741, BD                      | Treg isolation      |
| CD127                        | FITC          | HIL-7R-M21, 560549, BD                  | Treg isolation      |
| FOXP3                        | PE            | 259D/C7, 560046, BD                     | Treg isolation      |
| ARG2                         | N/A           | EPR9473, ab137069, abcam                | Western blot        |
| Vinculin                     | N/A           | V284, SAB4200080, Sigma-Aldrich         | Western blot        |
| Anti-rabbit, IgG, HRP-linked | N/A           | N/A, CST7074, Cell Signaling Technology | Western blot        |
| Anti-mouse, IgG, HRP-linked  | N/A           | N/A, CST7076, Cell Signaling Technology | Western blot        |

**Supplementary Table S2: List of antibodies used in this study**

\*The dead cell marker is Fixable Viability Stain 510 and thus not an antibody. N/A = not applicable.
