# Supplementary material for: Arginase-2-specific cytotoxic T cells specifically recognize functional regulatory T cells
Source: PubMed Central journal article supplement — J Immunother Cancer. 2022 Oct 31;10(10):e005326. doi: 10.1136/jitc-2022-005326 (PMC9628693; doi:10.1136/jitc-2022-005326), 2022-10-31
Supplement: jitc-2022-005326supp012.pdf [file jitc-2022-005326supp012.pdf]

| RT-qPCR PRIMERS |               |                   |
|-----------------|---------------|-------------------|
| GENE            | PRIMER ID     | SOURCE            |
| <i>ARG1</i>     | Hs00163660_ml | Thermo Scientific |
| <i>ARG2</i>     | Hs00982833_ml | Thermo Scientific |
| <i>CTLA4</i>    | Hs00175480_ml | Thermo Scientific |
| <i>FOXP3</i>    | Hs01085834_ml | Thermo Scientific |
| <i>IKZ2</i>     | Hs00212361_ml | Thermo Scientific |
| <i>IL-10</i>    | Hs00961622_ml | Thermo Scientific |
| <i>IL2RA</i>    | Hs00907777_ml | Thermo Scientific |
| <i>POL2RA</i>   | Hs00172187_ml | Thermo Scientific |
| <i>TNFRSF18</i> | Hs00188346_ml | Thermo Scientific |
| <i>PDCDI</i>    | Hs01550088_ml | Thermo Scientific |

**Supplementary Table S3: List of RT-qPCR primers used in the study**
