# Supplementary material for: Arginase-2-specific cytotoxic T cells specifically recognize functional regulatory T cells
Source: PubMed Central journal article supplement — J Immunother Cancer. 2022 Oct 31;10(10):e005326. doi: 10.1136/jitc-2022-005326 (PMC9628693; doi:10.1136/jitc-2022-005326), 2022-10-31
Supplement: jitc-2022-005326supp014.pdf [file jitc-2022-005326supp014.pdf]

**Supplementary table S5.** Gene ontology analysis for biological processes associated with differentially upregulated genes between Pan02 tumors from mice that were treated with ARG2 vaccine compared to mice that received a control vaccine.

**GO BIOLOGICAL PROCESSES ASSOCIATED WITH THE DIFFERENTIALLY UPREGULATED GENES (FDR<0.05)**

Each process is classified as immune-related (1) or non-immune related (0) in column "Immune related (0/1)"

| GO biological process complete                                          | Mus musculus - REFLIST (21997) | upload_1 (50) | upload_1 (expected) | upload_1 (over/under) | upload_1 (fold Enrichment) | upload_1 (raw P-value) | upload_1 (FDR) | Immune related (0/1) |
|-------------------------------------------------------------------------|--------------------------------|---------------|---------------------|-----------------------|----------------------------|------------------------|----------------|----------------------|
| response to interferon-beta (GO:0035456)                                | 64                             | 14            | 0,72                | +                     | 19,47                      | 1.64E-13               | 3,69E-10       | 1                    |
| cellular response to interferon-beta (GO:0035458)                       | 56                             | 13            | 0,63                | +                     | 20,67                      | 6.37E-13               | 1,11E-09       | 1                    |
| cellular response to cytokine stimulus (GO:0071345)                     | 690                            | 30            | 7,75                | +                     | 3,87                       | 5.39E-10               | 5,00E-07       | 1                    |
| response to cytokine (GO:0034097)                                       | 792                            | 32            | 8,9                 | +                     | 3,6                        | 7.85E-10               | 6,51E-07       | 1                    |
| positive regulation of cytokine production (GO:0001819)                 | 499                            | 25            | 5,61                | +                     | 4,46                       | 1.08E-09               | 8,53E-07       | 1                    |
| immune system process (GO:0002376)                                      | 2494                           | 62            | 28,02               | +                     | 2,21                       | 2.17E-09               | 1,56E-06       | 1                    |
| regulation of cytokine production (GO:0001817)                          | 773                            | 30            | 8,68                | +                     | 3,45                       | 6.77E-09               | 4,45E-06       | 1                    |
| immune response (GO:0006955)                                            | 1614                           | 45            | 18,13               | +                     | 2,48                       | 2.42E-08               | 1,36E-05       | 1                    |
| regulation of immune system process (GO:0002682)                        | 1637                           | 41            | 18,39               | +                     | 2,23                       | 2.24E-06               | 8,61E-04       | 1                    |
| positive regulation of interferon-beta production (GO:0032728)          | 48                             | 7             | 0,54                | +                     | 12,98                      | 2.47E-06               | 9,27E-04       | 1                    |
| response to type I interferon (GO:0034340)                              | 34                             | 6             | 0,38                | +                     | 15,71                      | 4.95E-06               | 1,77E-03       | 1                    |
| positive regulation of interleukin-1 beta production (GO:0032731)       | 62                             | 7             | 0,7                 | +                     | 10,05                      | 1.15E-05               | 3,36E-03       | 1                    |
| positive regulation of type I interferon production (GO:0032481)        | 68                             | 7             | 0,76                | +                     | 9,16                       | 2.00E-05               | 4,85E-03       | 1                    |
| cytokine-mediated signaling pathway (GO:0019221)                        | 312                            | 14            | 3,5                 | +                     | 3,99                       | 1.86E-05               | 4,88E-03       | 1                    |
| positive regulation of cytosolic calcium ion concentration (GO:0007204) | 313                            | 14            | 3,52                | +                     | 3,98                       | 1.92E-05               | 4,88E-03       | 1                    |
| cellular response to type I interferon (GO:0071357)                     | 25                             | 5             | 0,28                | +                     | 17,8                       | 1.84E-05               | 4,93E-03       | 1                    |
| type I interferon signaling pathway (GO:0060337)                        | 25                             | 5             | 0,28                | +                     | 17,8                       | 1.84E-05               | 5,01E-03       | 1                    |
| regulation of interferon-beta production (GO:0032648)                   | 67                             | 7             | 0,75                | +                     | 9,3                        | 1.83E-05               | 5,06E-03       | 1                    |

|                                                                                 |      |    |       |   |       |          |          |   |
|---------------------------------------------------------------------------------|------|----|-------|---|-------|----------|----------|---|
| regulation of innate immune response (GO:0045088)                               | 237  | 12 | 2,66  | + | 4,51  | 2.41E-05 | 5,75E-03 | 1 |
| positive regulation of immune system process (GO:0002684)                       | 1094 | 29 | 12,29 | + | 2,36  | 2.45E-05 | 5,75E-03 | 1 |
| innate immune response (GO:0045087)                                             | 875  | 25 | 9,83  | + | 2,54  | 2.57E-05 | 5,96E-03 | 1 |
| regulation of immune response (GO:0050776)                                      | 1051 | 28 | 11,81 | + | 2,37  | 3.24E-05 | 7,30E-03 | 1 |
| positive regulation of interleukin-1 production (GO:0032732)                    | 74   | 7  | 0,83  | + | 8,42  | 3.31E-05 | 7,36E-03 | 1 |
| response to interferon-alpha (GO:0035455)                                       | 31   | 5  | 0,35  | + | 14,36 | 4.62E-05 | 9,98E-03 | 1 |
| positive regulation of tumor necrosis factor production (GO:0032760)            | 109  | 8  | 1,22  | + | 6,53  | 4.98E-05 | 1,06E-02 | 1 |
| positive regulation of tumor necrosis factor superfamily cytokine production    | 111  | 8  | 1,25  | + | 6,42  | 5.62E-05 | 1,15E-02 | 1 |
| regulation of tumor necrosis factor production (GO:0032680)                     | 184  | 10 | 2,07  | + | 4,84  | 6.58E-05 | 1,31E-02 | 1 |
| regulation of tumor necrosis factor superfamily cytokine production             | 187  | 10 | 2,1   | + | 4,76  | 7.48E-05 | 1,46E-02 | 1 |
| regulation of vasoconstriction (GO:0019229)                                     | 86   | 7  | 0,97  | + | 7,25  | 8.06E-05 | 1,55E-02 | 1 |
| cellular response to interferon-alpha (GO:0035457)                              | 19   | 4  | 0,21  | + | 18,74 | 1.11E-04 | 2,00E-02 | 1 |
| regulation of interleukin-1 beta production (GO:0032651)                        | 96   | 7  | 1,08  | + | 6,49  | 1.54E-04 | 2,63E-02 | 1 |
| lymphocyte chemotaxis (GO:0048247)                                              | 42   | 5  | 0,47  | + | 10,6  | 1.70E-04 | 2,86E-02 | 1 |
| regulation of type I interferon-mediated signaling pathway (GO:0060338)         | 42   | 5  | 0,47  | + | 10,6  | 1.70E-04 | 2,89E-02 | 1 |
| regulation of angiogenesis (GO:0045765)                                         | 299  | 12 | 3,36  | + | 3,57  | 2.00E-04 | 3,22E-02 | 1 |
| regulation of vasculature development (GO:1901342)                              | 303  | 12 | 3,4   | + | 3,53  | 2.25E-04 | 3,52E-02 | 1 |
| regulation of type I interferon production (GO:0032479)                         | 103  | 7  | 1,16  | + | 6,05  | 2.31E-04 | 3,53E-02 | 1 |
| T cell chemotaxis (GO:0010818)                                                  | 9    | 3  | 0,1   | + | 29,67 | 2.77E-04 | 3,96E-02 | 1 |
| negative regulation of chemokine (C-X-C motif) ligand 2 production (GO:2000342) | 10   | 3  | 0,11  | + | 26,71 | 3.57E-04 | 4,85E-02 | 1 |
| negative regulation of IP-10 production (GO:0071659)                            | 10   | 3  | 0,11  | + | 26,71 | 3.57E-04 | 4,89E-02 | 1 |
| negative regulation of innate immune response (GO:0045824)                      | 84   | 9  | 0,94  | + | 9,54  | 9.51E-07 | 4,05E-04 | 1 |
| negative regulation of immune response (GO:0050777)                             | 188  | 12 | 2,11  | + | 5,68  | 2.62E-06 | 9,60E-04 | 1 |

|                                                                                  |      |     |       |   |       |          |          |   |
|----------------------------------------------------------------------------------|------|-----|-------|---|-------|----------|----------|---|
| negative regulation of defense response (GO:0031348)                             | 238  | 11  | 2,67  | + | 4,11  | 1.14E-04 | 2,02E-02 | 1 |
| negative regulation of immune system process (GO:0002683)                        | 448  | 15  | 5,03  | + | 2,98  | 2.26E-04 | 3,49E-02 | 1 |
| negative regulation of type I interferon-mediated signaling pathway (GO:0060339) | 24   | 4   | 0,27  | + | 14,84 | 2.47E-04 | 3,70E-02 | 1 |
| defense response to virus (GO:0051607)                                           | 226  | 21  | 2,54  | + | 8,27  | 6.04E-13 | 1,19E-09 | 1 |
| response to virus (GO:0009615)                                                   | 287  | 22  | 3,22  | + | 6,82  | 5.87E-12 | 7,71E-09 | 1 |
| response to bacterium (GO:0009617)                                               | 896  | 36  | 10,07 | + | 3,58  | 7.04E-11 | 7,93E-08 | 1 |
| negative regulation of viral process (GO:0048525)                                | 102  | 13  | 1,15  | + | 11,35 | 5.12E-10 | 5,05E-07 | 1 |
| regulation of viral life cycle (GO:1903900)                                      | 143  | 14  | 1,61  | + | 8,72  | 2.57E-09 | 1,76E-06 | 1 |
| regulation of viral genome replication (GO:0045069)                              | 87   | 11  | 0,98  | + | 11,26 | 1.22E-08 | 7,68E-06 | 1 |
| regulation of viral process (GO:0050792)                                         | 166  | 14  | 1,86  | + | 7,51  | 1.50E-08 | 9,12E-06 | 1 |
| response to external biotic stimulus (GO:0043207)                                | 1490 | 59  | 16,74 | + | 3,52  | 2.76E-17 | 1,45E-13 | 0 |
| response to other organism (GO:0051707)                                          | 1488 | 59  | 16,72 | + | 3,53  | 2.60E-17 | 2,05E-13 | 0 |
| biological process involved in interspecies interaction between organisms        | 1624 | 61  | 18,24 | + | 3,34  | 7.75E-17 | 3,06E-13 | 0 |
| response to biotic stimulus (GO:0009607)                                         | 1529 | 60  | 17,18 | + | 3,49  | 2.08E-17 | 3,28E-13 | 0 |
| response to external stimulus (GO:0009605)                                       | 2452 | 76  | 27,54 | + | 2,76  | 1.40E-16 | 4,40E-13 | 0 |
| defense response (GO:0006952)                                                    | 1493 | 57  | 16,77 | + | 3,4   | 5.19E-16 | 1,36E-12 | 0 |
| defense response to symbiont (GO:0140546)                                        | 227  | 21  | 2,55  | + | 8,24  | 6.54E-13 | 1,03E-09 | 0 |
| response to stimulus (GO:0050896)                                                | 8671 | 153 | 97,4  | + | 1,57  | 1.78E-12 | 2,54E-09 | 0 |
| defense response to other organism (GO:0098542)                                  | 1119 | 42  | 12,57 | + | 3,34  | 1.19E-11 | 1,44E-08 | 0 |
| negative regulation of viral genome replication (GO:0045071)                     | 59   | 11  | 0,66  | + | 16,6  | 3.09E-10 | 3,25E-07 | 0 |
| response to stress (GO:0006950)                                                  | 3303 | 76  | 37,1  | + | 2,05  | 5.51E-10 | 4,82E-07 | 0 |
| regulation of multicellular organismal process (GO:0051239)                      | 2900 | 69  | 32,58 | + | 2,12  | 1.22E-09 | 9,16E-07 | 0 |
| response to organic substance (GO:0010033)                                       | 2608 | 62  | 29,3  | + | 2,12  | 1.63E-08 | 9,51E-06 | 0 |

|                                                                      |      |     |       |   |        |          |          |   |
|----------------------------------------------------------------------|------|-----|-------|---|--------|----------|----------|---|
| cellular response to chemical stimulus (GO:0070887)                  | 2473 | 59  | 27,78 | + | 2,12   | 2.60E-08 | 1,41E-05 | 0 |
| positive regulation of gene expression (GO:0010628)                  | 1203 | 37  | 13,51 | + | 2,74   | 4.07E-08 | 2,14E-05 | 0 |
| response to chemical (GO:0042221)                                    | 3577 | 75  | 40,18 | + | 1,87   | 5.13E-08 | 2,61E-05 | 0 |
| cellular response to organic substance (GO:0071310)                  | 1866 | 48  | 20,96 | + | 2,29   | 7.46E-08 | 3,67E-05 | 0 |
| positive regulation of multicellular organismal process (GO:0051240) | 1639 | 44  | 18,41 | + | 2,39   | 8.82E-08 | 4,21E-05 | 0 |
| positive regulation of biological process (GO:0048518)               | 6454 | 110 | 72,5  | + | 1,52   | 5.19E-07 | 2,34E-04 | 0 |
| positive regulation of response to stimulus (GO:0048584)             | 2367 | 54  | 26,59 | + | 2,03   | 5.08E-07 | 2,35E-04 | 0 |
| regulation of response to external stimulus (GO:0032101)             | 967  | 30  | 10,86 | + | 2,76   | 7.50E-07 | 3,28E-04 | 0 |
| regulation of nuclease activity (GO:0032069)                         | 27   | 6   | 0,3   | + | 19,78  | 1.52E-06 | 6,16E-04 | 0 |
| positive regulation of response to external stimulus (GO:0032103)    | 452  | 19  | 5,08  | + | 3,74   | 1.50E-06 | 6,21E-04 | 0 |
| regulation of ribonuclease activity (GO:0060700)                     | 15   | 5   | 0,17  | + | 29,67  | 2.20E-06 | 8,66E-04 | 0 |
| positive regulation of cell communication (GO:0010647)               | 1764 | 42  | 19,82 | + | 2,12   | 5.21E-06 | 1,83E-03 | 0 |
| sensory perception of smell (GO:0007608)                             | 1124 | 0   | 12,63 | - | < 0,01 | 5.51E-06 | 1,85E-03 | 0 |
| positive regulation of signaling (GO:0023056)                        | 1771 | 42  | 19,89 | + | 2,11   | 5.49E-06 | 1,88E-03 | 0 |
| ion homeostasis (GO:0050801)                                         | 809  | 25  | 9,09  | + | 2,75   | 7.15E-06 | 2,35E-03 | 0 |
| chemical homeostasis (GO:0048878)                                    | 1201 | 32  | 13,49 | + | 2,37   | 7.87E-06 | 2,48E-03 | 0 |
| inorganic ion homeostasis (GO:0098771)                               | 760  | 24  | 8,54  | + | 2,81   | 7.77E-06 | 2,50E-03 | 0 |
| positive regulation of cellular process (GO:0048522)                 | 5933 | 99  | 66,65 | + | 1,49   | 9.84E-06 | 3,04E-03 | 0 |
| cellular macromolecule metabolic process (GO:0044260)                | 4105 | 21  | 46,11 | - | 0,46   | 1.12E-05 | 3,33E-03 | 0 |
| metal ion homeostasis (GO:0055065)                                   | 672  | 22  | 7,55  | + | 2,91   | 1.10E-05 | 3,34E-03 | 0 |
| negative regulation of response to biotic stimulus (GO:0002832)      | 117  | 9   | 1,31  | + | 6,85   | 1.19E-05 | 3,40E-03 | 0 |
| regulation of response to stimulus (GO:0048583)                      | 4055 | 74  | 45,55 | + | 1,62   | 1.56E-05 | 4,38E-03 | 0 |
| regulation of cytosolic calcium ion concentration (GO:0051480)       | 357  | 15  | 4,01  | + | 3,74   | 1.96E-05 | 4,82E-03 | 0 |

|                                                                                |      |    |       |   |      |          |          |   |
|--------------------------------------------------------------------------------|------|----|-------|---|------|----------|----------|---|
| cation homeostasis (GO:0055080)                                                | 751  | 23 | 8,44  | + | 2,73 | 1.94E-05 | 4,85E-03 | 0 |
| homeostatic process (GO:0042592)                                               | 1680 | 39 | 18,87 | + | 2,07 | 1.91E-05 | 4,94E-03 | 0 |
| sensory perception of chemical stimulus (GO:0007606)                           | 1224 | 1  | 13,75 | - | 0,07 | 2.85E-05 | 6,51E-03 | 0 |
| regulation of defense response (GO:0031347)                                    | 627  | 20 | 7,04  | + | 2,84 | 3.99E-05 | 8,74E-03 | 0 |
| regulation of cellular response to growth factor stimulus (GO:0090287)         | 299  | 13 | 3,36  | + | 3,87 | 5.04E-05 | 1,06E-02 | 0 |
| regulation of biological quality (GO:0065008)                                  | 3901 | 70 | 43,82 | + | 1,6  | 5.22E-05 | 1,08E-02 | 0 |
| regulation of cold-induced thermogenesis (GO:0120161)                          | 146  | 9  | 1,64  | + | 5,49 | 6.12E-05 | 1,24E-02 | 0 |
| cell surface receptor signaling pathway (GO:0007166)                           | 1967 | 42 | 22,1  | + | 1,9  | 7.21E-05 | 1,42E-02 | 0 |
| positive regulation of metabolic process (GO:0009893)                          | 3772 | 67 | 42,37 | + | 1,58 | 9.07E-05 | 1,72E-02 | 0 |
| regulation of response to biotic stimulus (GO:0002831)                         | 364  | 14 | 4,09  | + | 3,42 | 9.22E-05 | 1,73E-02 | 0 |
| positive regulation of signal transduction (GO:0009967)                        | 1555 | 35 | 17,47 | + | 2    | 9.54E-05 | 1,77E-02 | 0 |
| defense response to bacterium (GO:0042742)                                     | 513  | 17 | 5,76  | + | 2,95 | 9.80E-05 | 1,80E-02 | 0 |
| cellular protein metabolic process (GO:0044267)                                | 2999 | 14 | 33,69 | - | 0,42 | 1.08E-04 | 1,95E-02 | 0 |
| cellular calcium ion homeostasis (GO:0006874)                                  | 470  | 16 | 5,28  | + | 3,03 | 1.17E-04 | 2,04E-02 | 0 |
| divalent inorganic cation homeostasis (GO:0072507)                             | 531  | 17 | 5,96  | + | 2,85 | 1.46E-04 | 2,53E-02 | 0 |
| positive regulation of cold-induced thermogenesis (GO:0120162)                 | 98   | 7  | 1,1   | + | 6,36 | 1.73E-04 | 2,87E-02 | 0 |
| cellular metal ion homeostasis (GO:0006875)                                    | 596  | 18 | 6,7   | + | 2,69 | 1.88E-04 | 3,09E-02 | 0 |
| regulation of transmembrane receptor protein serine/threonine kinase signaling | 254  | 11 | 2,85  | + | 3,86 | 1.97E-04 | 3,20E-02 | 0 |
| cellular divalent inorganic cation homeostasis (GO:0072503)                    | 495  | 16 | 5,56  | + | 2,88 | 2.06E-04 | 3,28E-02 | 0 |
| calcium ion homeostasis (GO:0055074)                                           | 498  | 16 | 5,59  | + | 2,86 | 2.20E-04 | 3,47E-02 | 0 |
| triglyceride metabolic process (GO:0006641)                                    | 72   | 6  | 0,81  | + | 7,42 | 2.33E-04 | 3,53E-02 | 0 |
| regulation of morphogenesis of an epithelium (GO:1905330)                      | 73   | 6  | 0,82  | + | 7,32 | 2.50E-04 | 3,61E-02 | 0 |
| nucleic acid metabolic process (GO:0090304)                                    | 1804 | 6  | 20,27 | - | 0,3  | 2.49E-04 | 3,64E-02 | 0 |

|                                                                        |      |    |       |   |       |          |          |   |
|------------------------------------------------------------------------|------|----|-------|---|-------|----------|----------|---|
| cellular cation homeostasis (GO:0030003)                               | 665  | 19 | 7,47  | + | 2,54  | 2.47E-04 | 3,64E-02 | 0 |
| regulation of anatomical structure size (GO:0090066)                   | 556  | 17 | 6,25  | + | 2,72  | 2.47E-04 | 3,67E-02 | 0 |
| macromolecule metabolic process (GO:0043170)                           | 5553 | 38 | 62,38 | - | 0,61  | 2.80E-04 | 3,97E-02 | 0 |
| positive regulation of cell population proliferation (GO:0008284)      | 1005 | 25 | 11,29 | + | 2,21  | 3.18E-04 | 4,47E-02 | 0 |
| cellular ion homeostasis (GO:0006873)                                  | 681  | 19 | 7,65  | + | 2,48  | 3.30E-04 | 4,60E-02 | 0 |
| fatty acid metabolic process (GO:0006631)                              | 366  | 13 | 4,11  | + | 3,16  | 3.44E-04 | 4,76E-02 | 0 |
| regulation of chemokine (C-X-C motif) ligand 2 production (GO:2000341) | 27   | 4  | 0,3   | + | 13,19 | 3.69E-04 | 4,98E-02 | 0 |

#### IMMUNE-RELATED GO BIOLOGICAL PROCESSES ASSOCIATED WITH THE DIFFERENTIALLY UPREGULATED GENES (FDR<0.05)

Immune-related processes are classified into categories.

| GO biological process complete                                          | Category               | Selected for representation (figure 6) | upload_1 (FDR) |
|-------------------------------------------------------------------------|------------------------|----------------------------------------|----------------|
| positive regulation of cytosolic calcium ion concentration (GO:0007204) | Ca2+ immune activation | X                                      | 4,88E-03       |
| lymphocyte chemotaxis (GO:0048247)                                      | T cells/lymphocytes    | X                                      | 2,86E-02       |
| T cell chemotaxis (GO:0010818)                                          | T cells/lymphocytes    | X                                      | 3,96E-02       |
| cellular response to cytokine stimulus (GO:0071345)                     | Cytokines              | X                                      | 5,00E-07       |
| response to cytokine (GO:0034097)                                       | Cytokines              |                                        | 6,51E-07       |
| positive regulation of cytokine production (GO:0001819)                 | Cytokines              | X                                      | 8,53E-07       |
| regulation of cytokine production (GO:0001817)                          | Cytokines              |                                        | 4,45E-06       |
| cytokine-mediated signaling pathway (GO:0019221)                        | Cytokines              |                                        | 4,88E-03       |

|                                                                                           |                    |   |          |
|-------------------------------------------------------------------------------------------|--------------------|---|----------|
| negative regulation of chemokine (C-X-C motif) ligand 2 production (GO:2000342)           | Cytokines          | X | 4,85E-02 |
| negative regulation of CXCL10 (IP-10) production (GO:0071659)                             | Cytokines          | X | 4,89E-02 |
| positive regulation of tumor necrosis factor production (GO:0032760)                      | Cytokines          |   | 1,06E-02 |
| positive regulation of tumor necrosis factor superfamily cytokine production (GO:1903557) | Cytokines          | X | 1,15E-02 |
| regulation of tumor necrosis factor production (GO:0032680)                               | Cytokines          |   | 1,31E-02 |
| regulation of tumor necrosis factor superfamily cytokine production (GO:1903555)          | Cytokines          |   | 1,46E-02 |
| response to interferon-beta (GO:0035456)                                                  | Type I interferons | X | 3,69E-10 |
| cellular response to interferon-beta (GO:0035458)                                         | Type I interferons |   | 1,11E-09 |
| positive regulation of interferon-beta production (GO:0032728)                            | Type I interferons |   | 9,27E-04 |
| response to type I interferon (GO:0034340)                                                | Type I interferons |   | 1,77E-03 |
| positive regulation of type I interferon production (GO:0032481)                          | Type I interferons | X | 4,85E-03 |
| cellular response to type I interferon (GO:0071357)                                       | Type I interferons | X | 4,93E-03 |
| type I interferon signaling pathway (GO:0060337)                                          | Type I interferons |   | 5,01E-03 |
| regulation of interferon-beta production (GO:0032648)                                     | Type I interferons |   | 5,06E-03 |
| response to interferon-alpha (GO:0035455)                                                 | Type I interferons | X | 9,98E-03 |
| cellular response to interferon-alpha (GO:0035457)                                        | Type I interferons |   | 2,00E-02 |
| regulation of type I interferon-mediated signaling pathway (GO:0060338)                   | Type I interferons |   | 2,89E-02 |
| regulation of type I interferon production (GO:0032479)                                   | Type I interferons |   | 3,53E-02 |
| positive regulation of interleukin-1 beta production (GO:0032731)                         | IL-1               |   | 3,36E-03 |

|                                                              |                         |   |          |
|--------------------------------------------------------------|-------------------------|---|----------|
| positive regulation of interleukin-1 production (GO:0032732) | IL-1                    | X | 7,36E-03 |
| regulation of interleukin-1 beta production (GO:0032651)     | IL-1                    |   | 2,63E-02 |
| immune system process (GO:0002376)                           | General immune response | X | 1,56E-06 |
| immune response (GO:0006955)                                 | General immune response |   | 1,36E-05 |
| regulation of immune system process (GO:0002682)             | General immune response |   | 8,61E-04 |
| regulation of innate immune response (GO:0045088)            | General immune response |   | 5,75E-03 |
| positive regulation of immune system process (GO:0002684)    | General immune response |   | 5,75E-03 |
| innate immune response (GO:0045087)                          | General immune response |   | 5,96E-03 |
| regulation of immune response (GO:0050776)                   | General immune response |   | 7,30E-03 |
| regulation of vasoconstriction (GO:0019229)                  | Angiogenesis            |   | 1,55E-02 |
| regulation of angiogenesis (GO:0045765)                      | Angiogenesis            | X | 3,22E-02 |
| regulation of vasculature development (GO:1901342)           | Angiogenesis            | X | 3,52E-02 |
