# Supplementary material for: Arginase-2-specific cytotoxic T cells specifically recognize functional regulatory T cells
Source: PubMed Central journal article supplement — J Immunother Cancer. 2022 Oct 31;10(10):e005326. doi: 10.1136/jitc-2022-005326 (PMC9628693; doi:10.1136/jitc-2022-005326), 2022-10-31
Supplement: jitc-2022-005326supp015.pdf [file jitc-2022-005326supp015.pdf]

| <b>COMPACT POPULATION SCHEME</b> |                                                                                                           |
|----------------------------------|-----------------------------------------------------------------------------------------------------------|
| <b>IMMUCC ALGORITHM</b>          |                                                                                                           |
| <b>POPULATION</b>                | <b>SUB-POPULATIONS</b>                                                                                    |
| B cells                          | B.Cells.Naive<br>B.Cells.Memory<br>Plasma.cells                                                           |
| CD8 T-cells                      | T.Cells.CD8.Naive<br>T.Cells.CD8.Actived<br>T.Cells.CD8.Memory                                            |
| CD4 T-cells                      | T.Cells.CD4.Naive<br>T.Cells.CD4.Memory<br>T.Cells.CD4.Follicular<br>Th1.Cells<br>Th17.Cells<br>Th2.Cells |
| Regulatory T-cells               | -                                                                                                         |
| Gamma-delta T-cells              | -                                                                                                         |
| NK cells                         | NK.Resting<br>NK.Activated                                                                                |
| DC cells                         | DC.Activated<br>DC.Immature                                                                               |
| Monocytes                        | -                                                                                                         |
| Granulocytes                     | Eosinophil.Cells<br>Mast.Cells<br>Neutrophil.Cells                                                        |
| Macrophages                      | Mo.Macrophage<br>M1.Macrophage<br>M2.Macrophage                                                           |

**Supplementary Table S6: Overview of populations and subpopulations used in the compact population scheme for the ImmuCC algorithm.**
