# Supplementary material for: Arginase-2-specific cytotoxic T cells specifically recognize functional regulatory T cells
Source: PubMed Central journal article supplement — J Immunother Cancer. 2022 Oct 31;10(10):e005326. doi: 10.1136/jitc-2022-005326 (PMC9628693; doi:10.1136/jitc-2022-005326), 2022-10-31
Supplement: jitc-2022-005326supp016.pdf [file jitc-2022-005326supp016.pdf]

| <b>EXTENDED POPULATION SCHEME</b> |                                                    |
|-----------------------------------|----------------------------------------------------|
| <b>IMMUCC ALGORITHM</b>           |                                                    |
| <b>POPULATION</b>                 | <b>SUB-POPULATIONS</b>                             |
| B cells                           | B.Cells.Naive<br>B.Cells.Memory<br>Plasma.cells    |
| NK cells                          | NK.Resting<br>NK.Activated                         |
| DC cells                          | DC.Activated<br>DC.Immature                        |
| Granulocytes                      | Eosinophil.Cells<br>Mast.Cells<br>Neutrophil.Cells |
| T.Cells.CD8.Naive                 | -                                                  |
| T.Cells.CD8.Actived               | -                                                  |
| T.Cells.CD8.Memory                | -                                                  |
| T.Cells.CD4.Naive                 | -                                                  |
| T.Cells.CD4.Memory                | -                                                  |
| T.Cells.CD4.Follicular            | -                                                  |
| Treg.Cells                        | -                                                  |
| Th17.Cells                        | -                                                  |
| GammaDelta.T.cells                | -                                                  |
| Mo.Macrophage                     | -                                                  |
| M1.Macrophage                     | -                                                  |
| M2.Macrophage                     | -                                                  |
| Monocytes                         | -                                                  |

**Supplementary Table S7: Overview of populations and subpopulations used in the extended population scheme for the ImmuCC algorithm.**
