# Supplementary figures and images for: Arginase-2-specific cytotoxic T cells specifically recognize functional regulatory T cells
Source: PubMed Central journal article supplement — J Immunother Cancer. 2022 Oct 31;10(10):e005326. doi: 10.1136/jitc-2022-005326 (PMC9628693; doi:10.1136/jitc-2022-005326), 2022-10-31

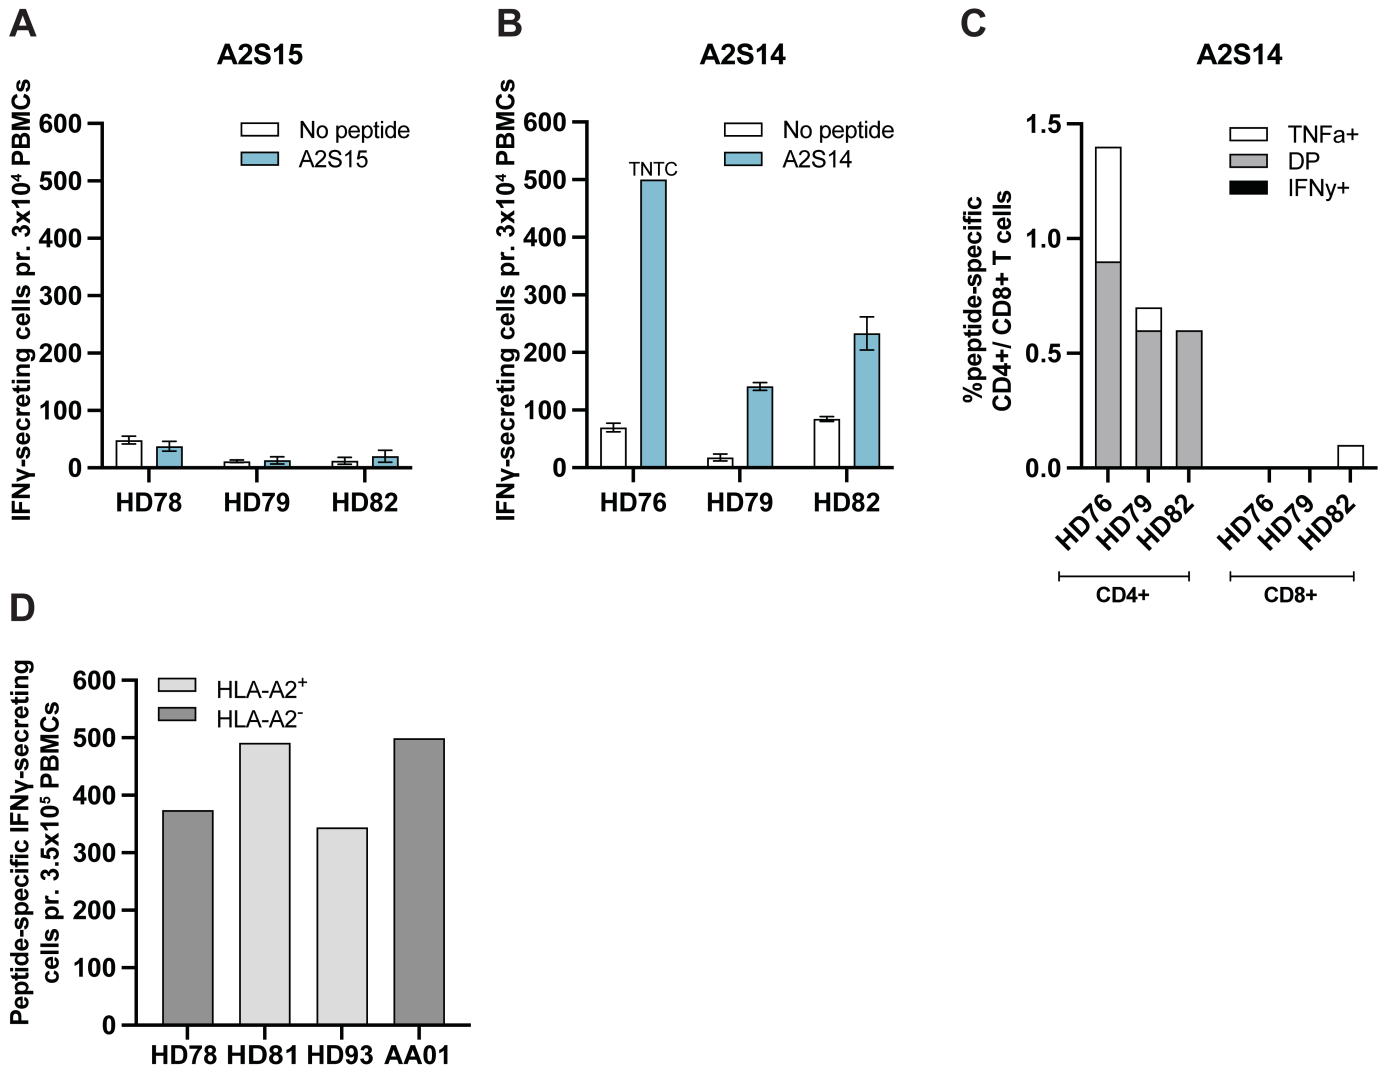

Supplement: jitc-2022-005326supp001.pdf [file jitc-2022-005326supp001.pdf]

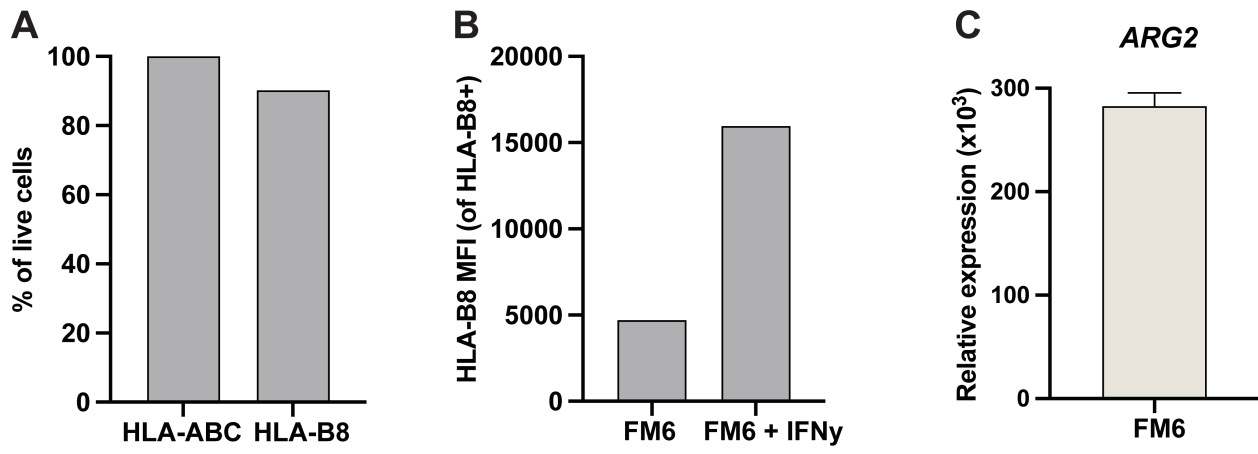

Supplement: jitc-2022-005326supp002.pdf [file jitc-2022-005326supp002.pdf]

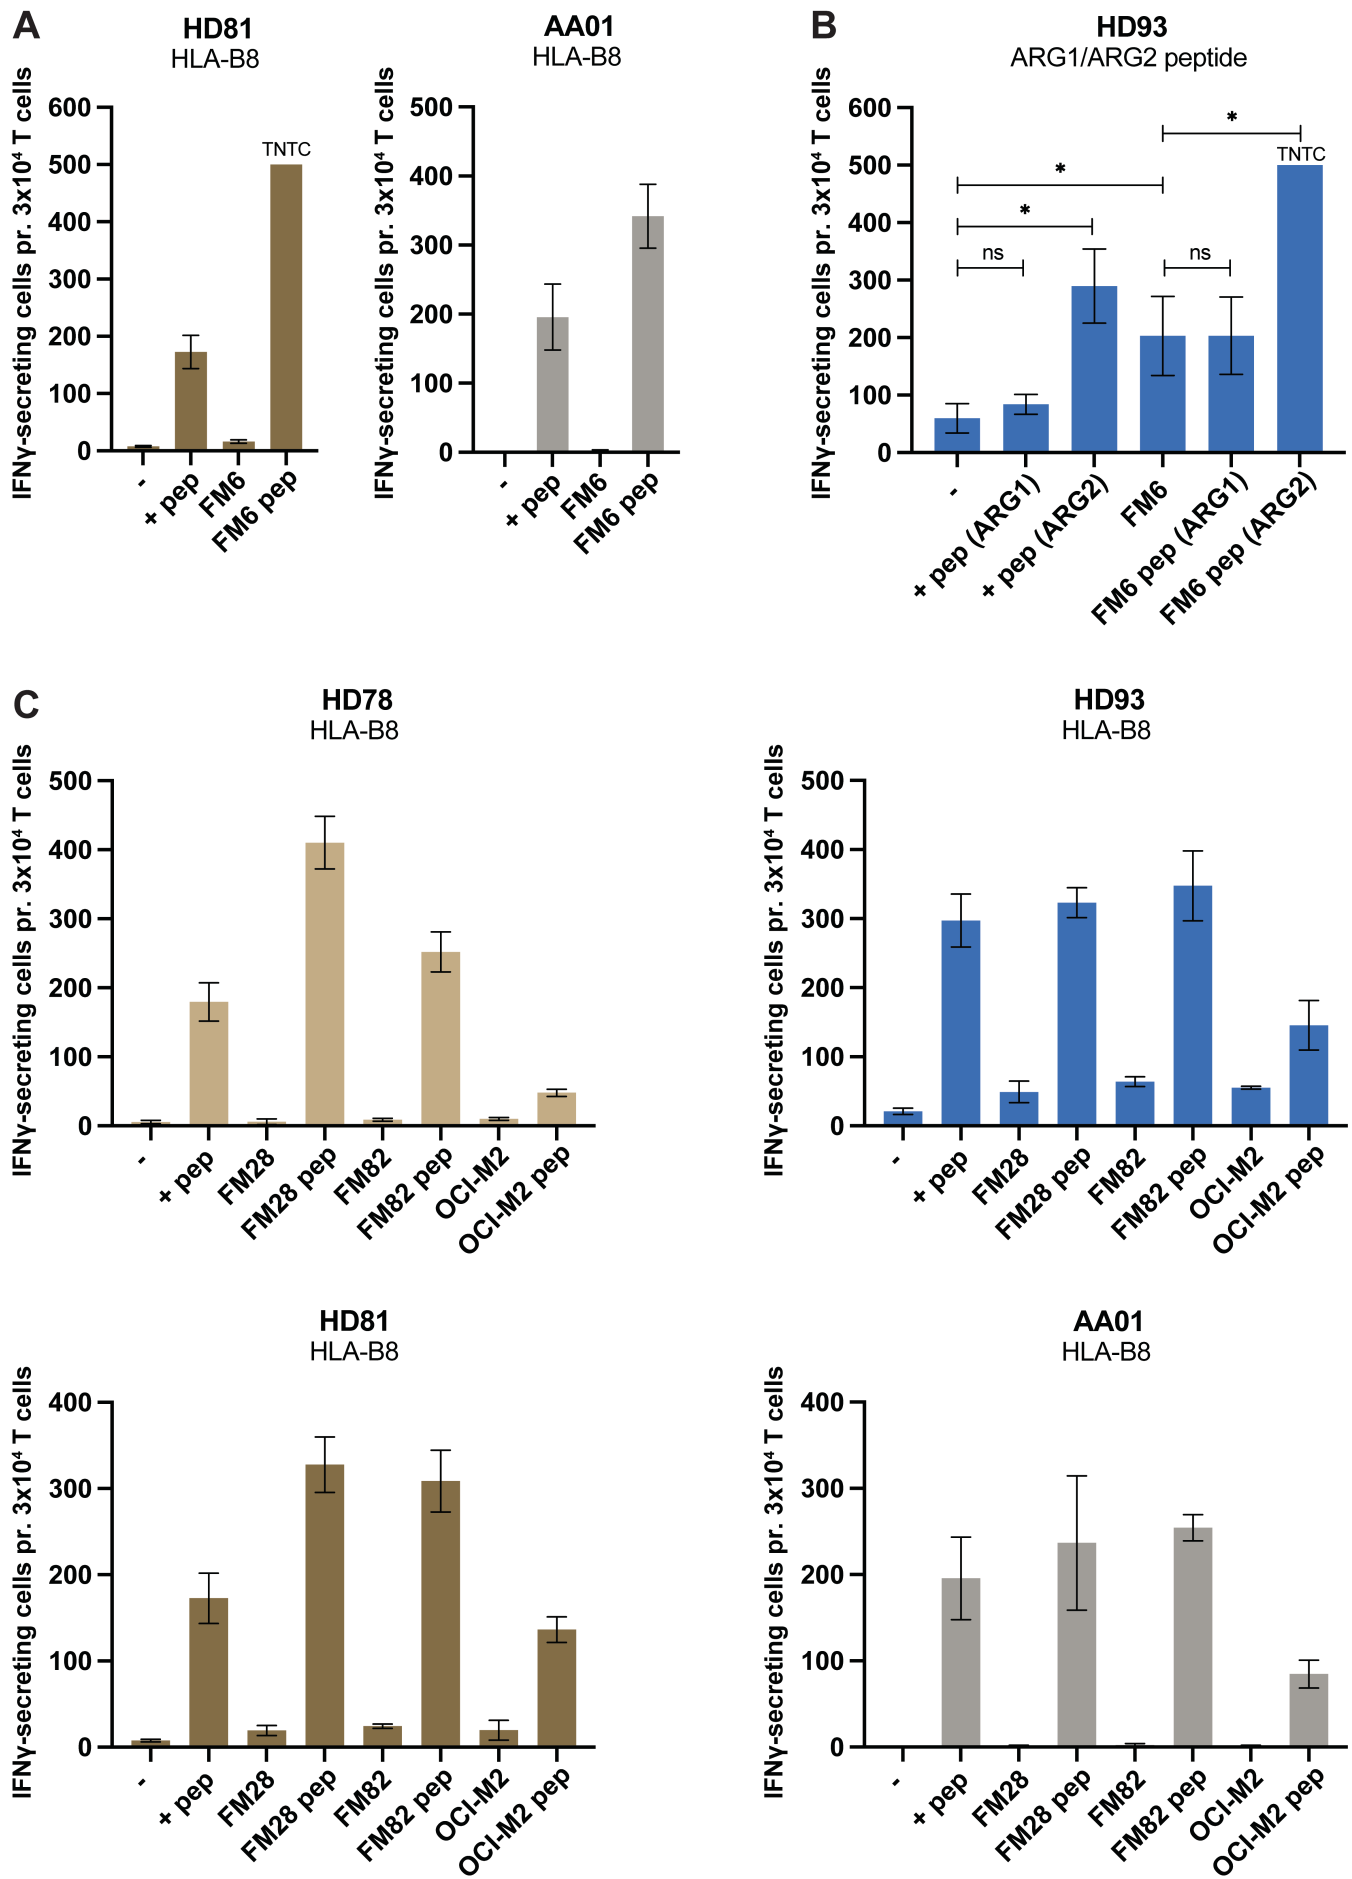

Supplement: jitc-2022-005326supp003.pdf [file jitc-2022-005326supp003.pdf]

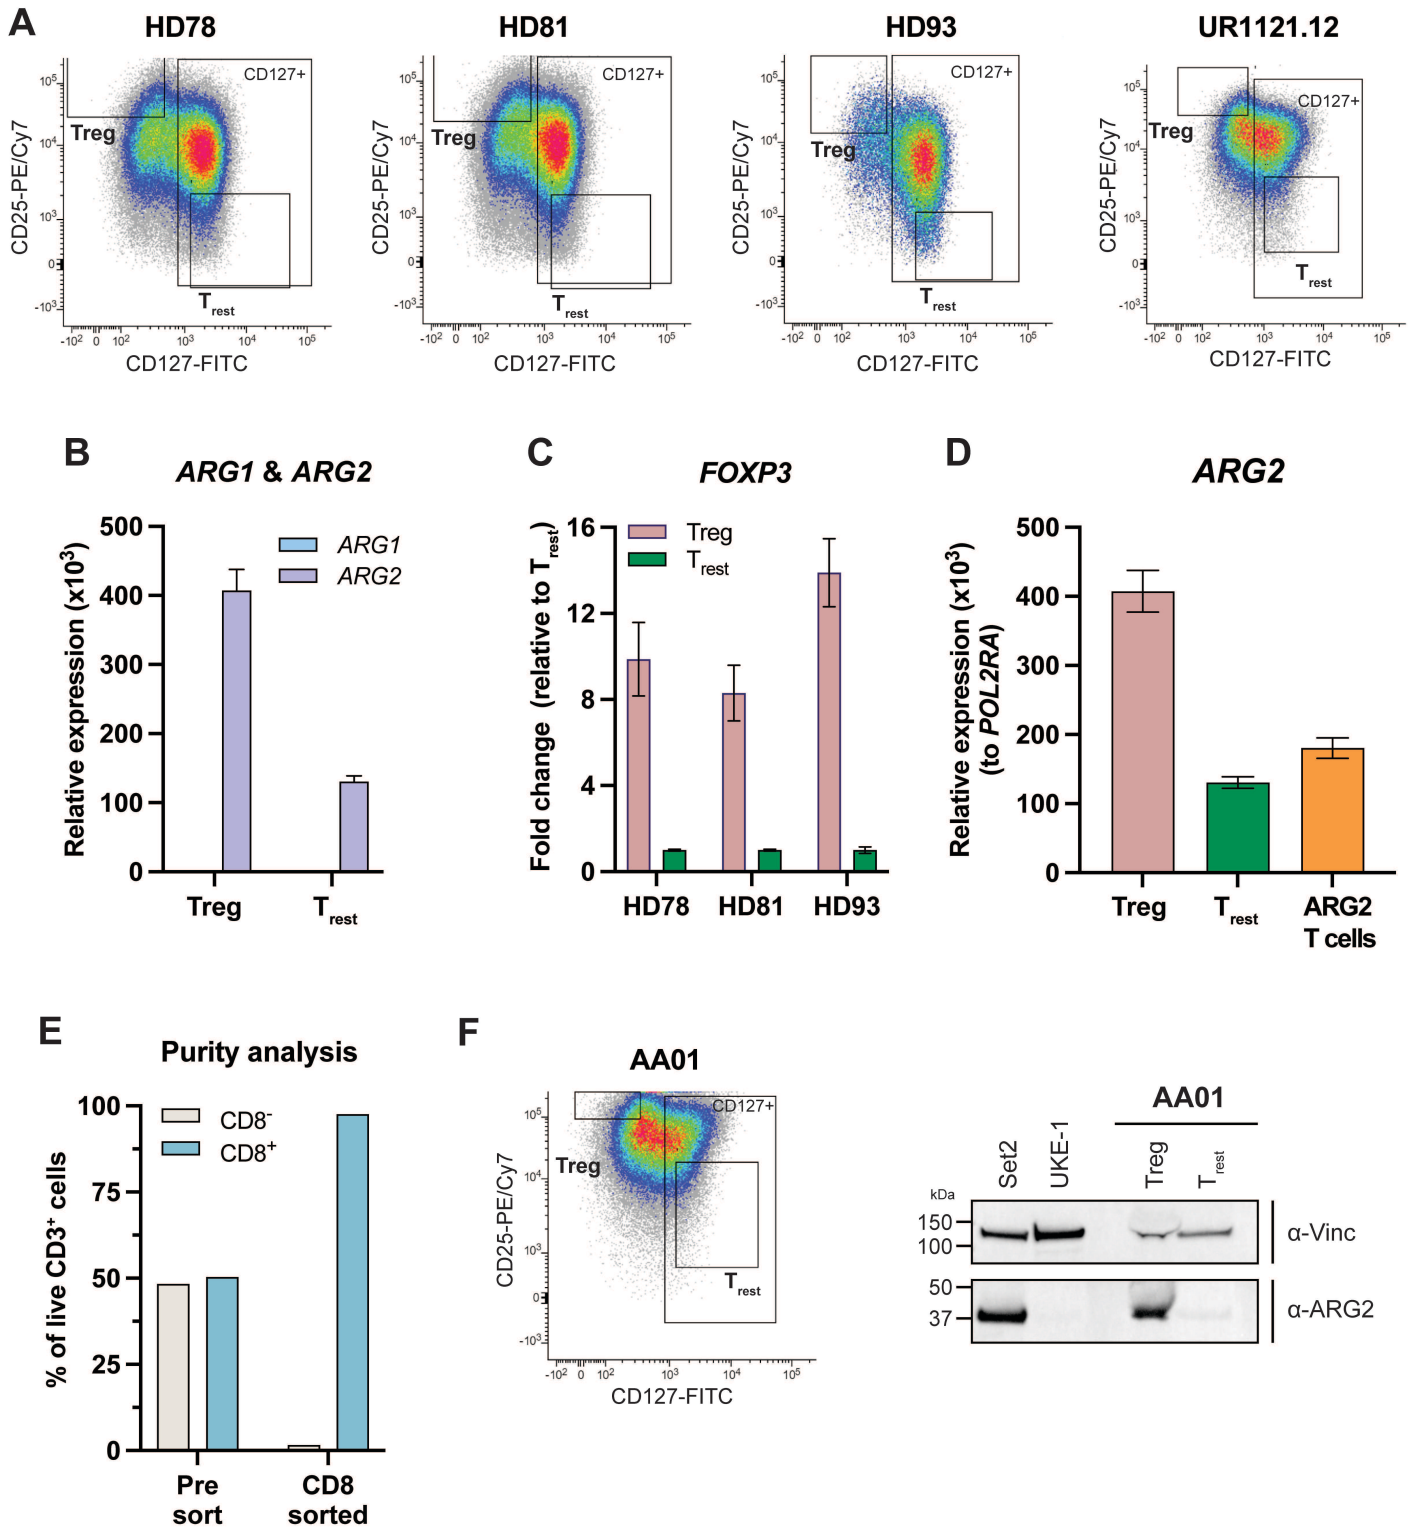

Supplement: jitc-2022-005326supp004.pdf [file jitc-2022-005326supp004.pdf]

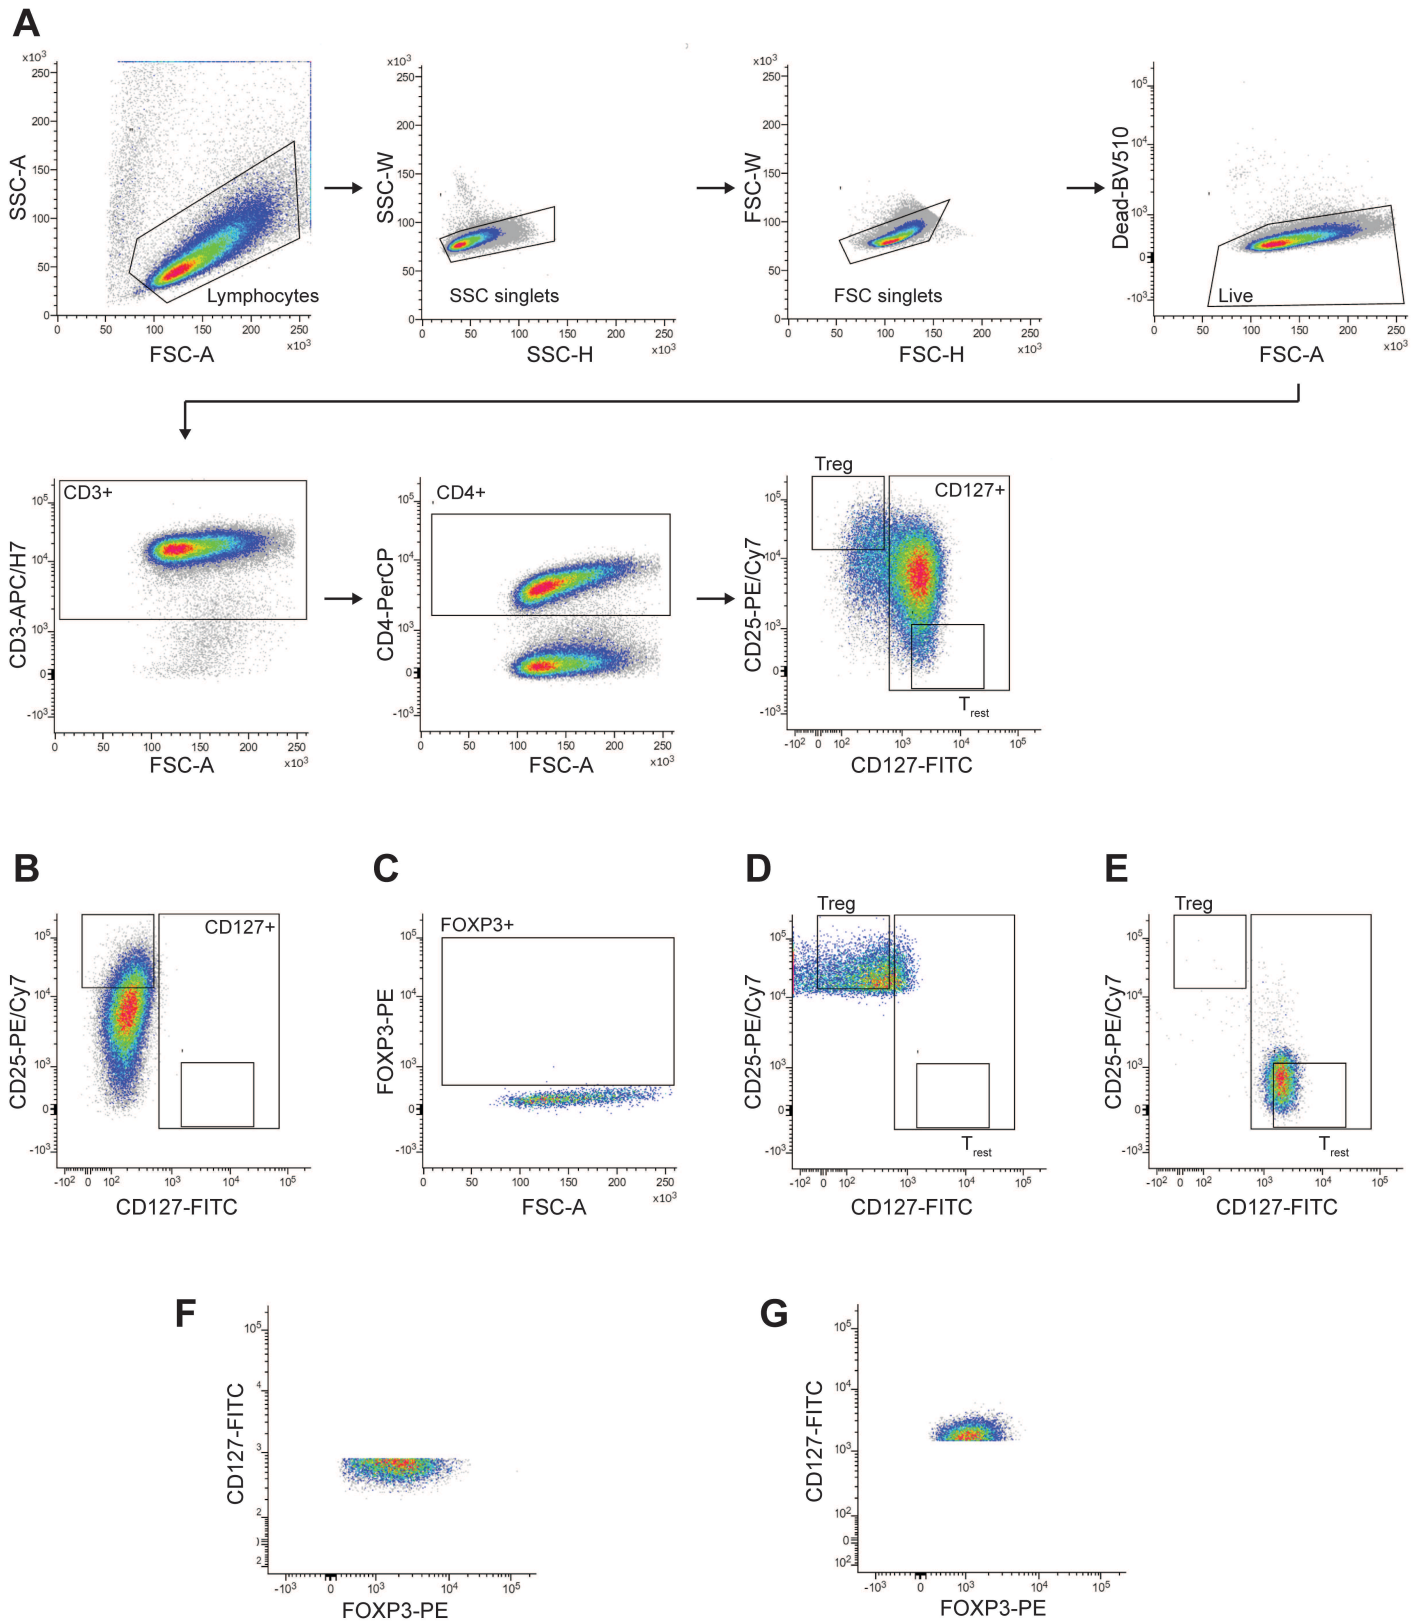

Supplement: jitc-2022-005326supp005.pdf [file jitc-2022-005326supp005.pdf]

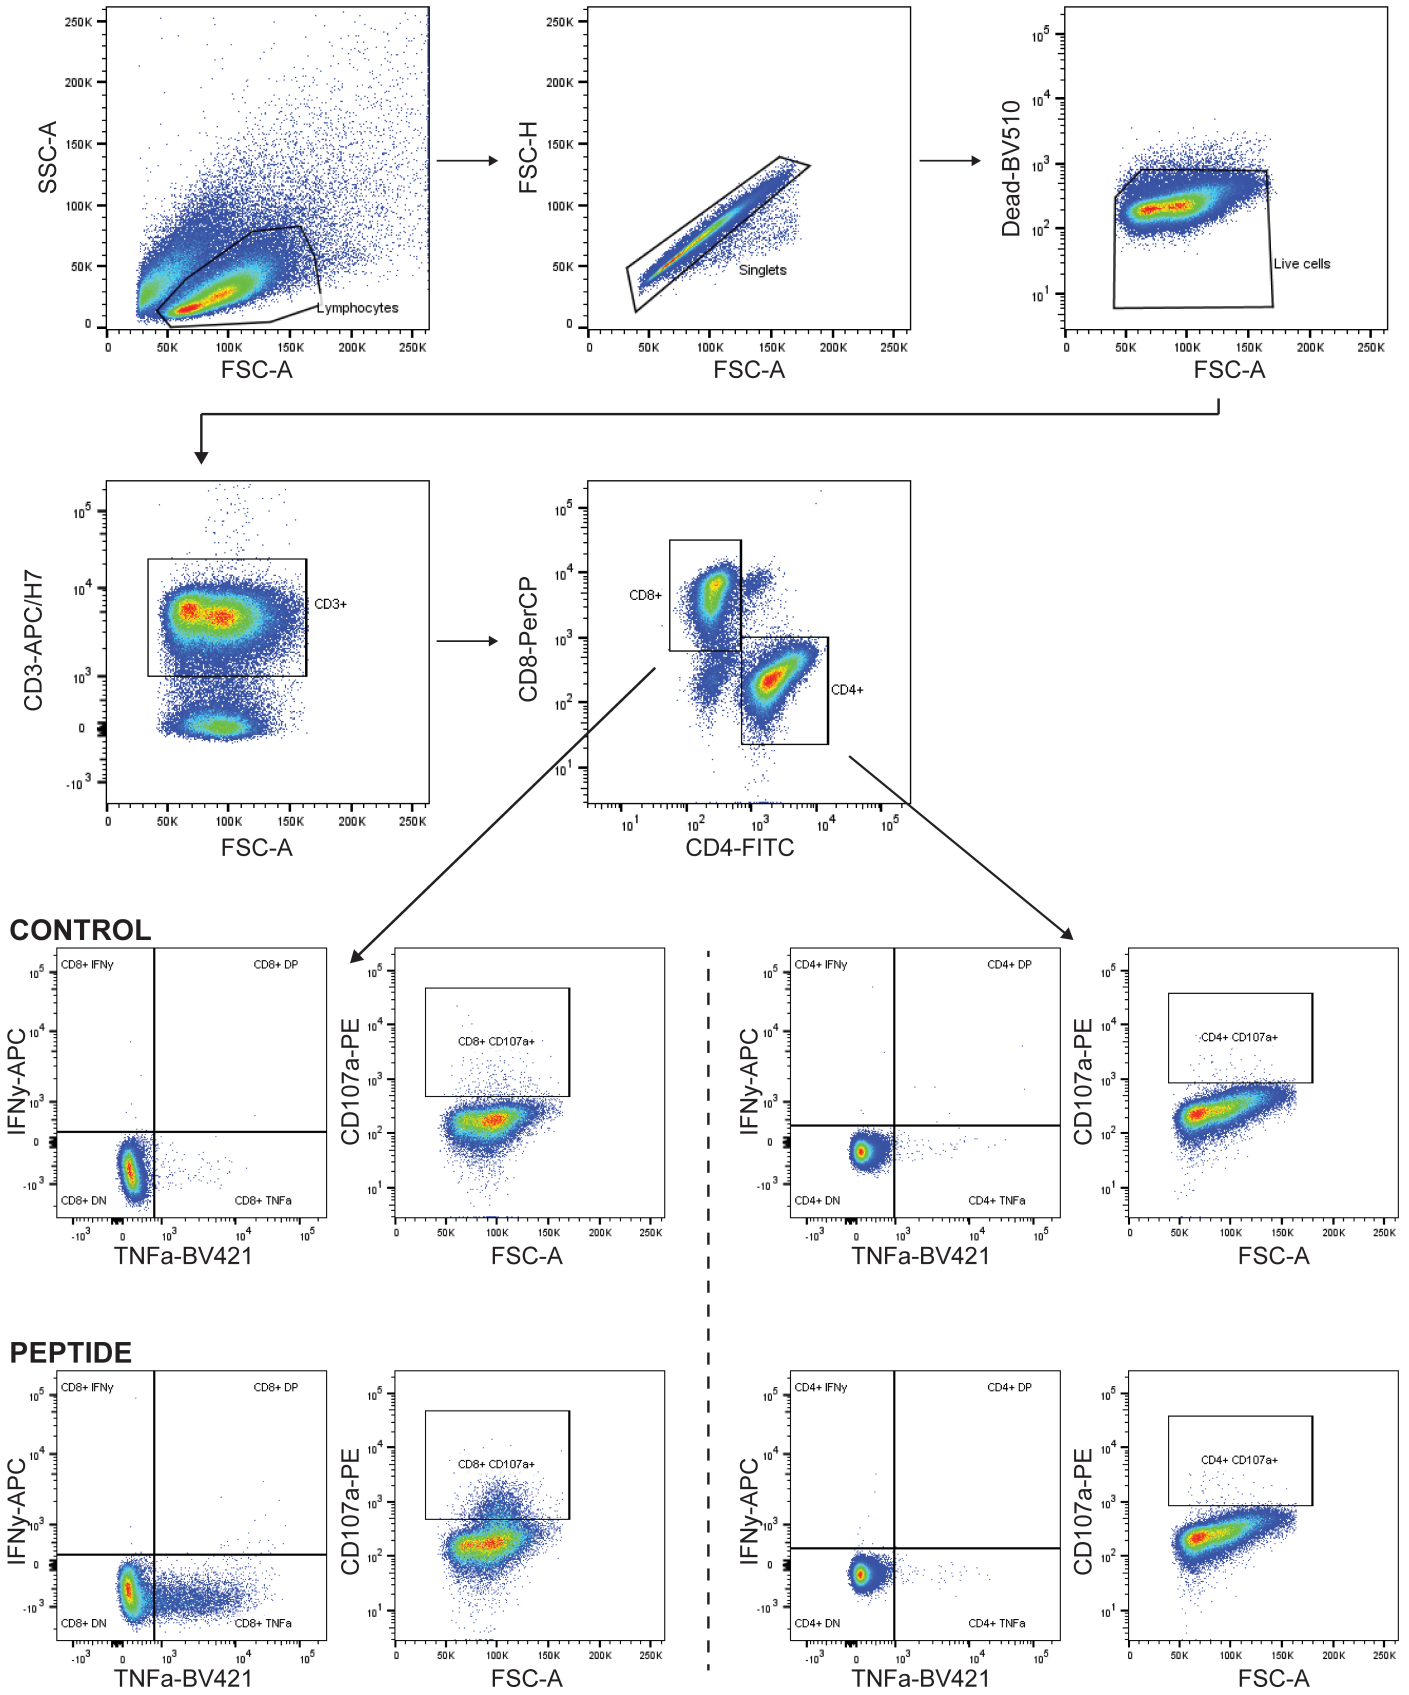

Supplement: jitc-2022-005326supp006.pdf [file jitc-2022-005326supp006.pdf]

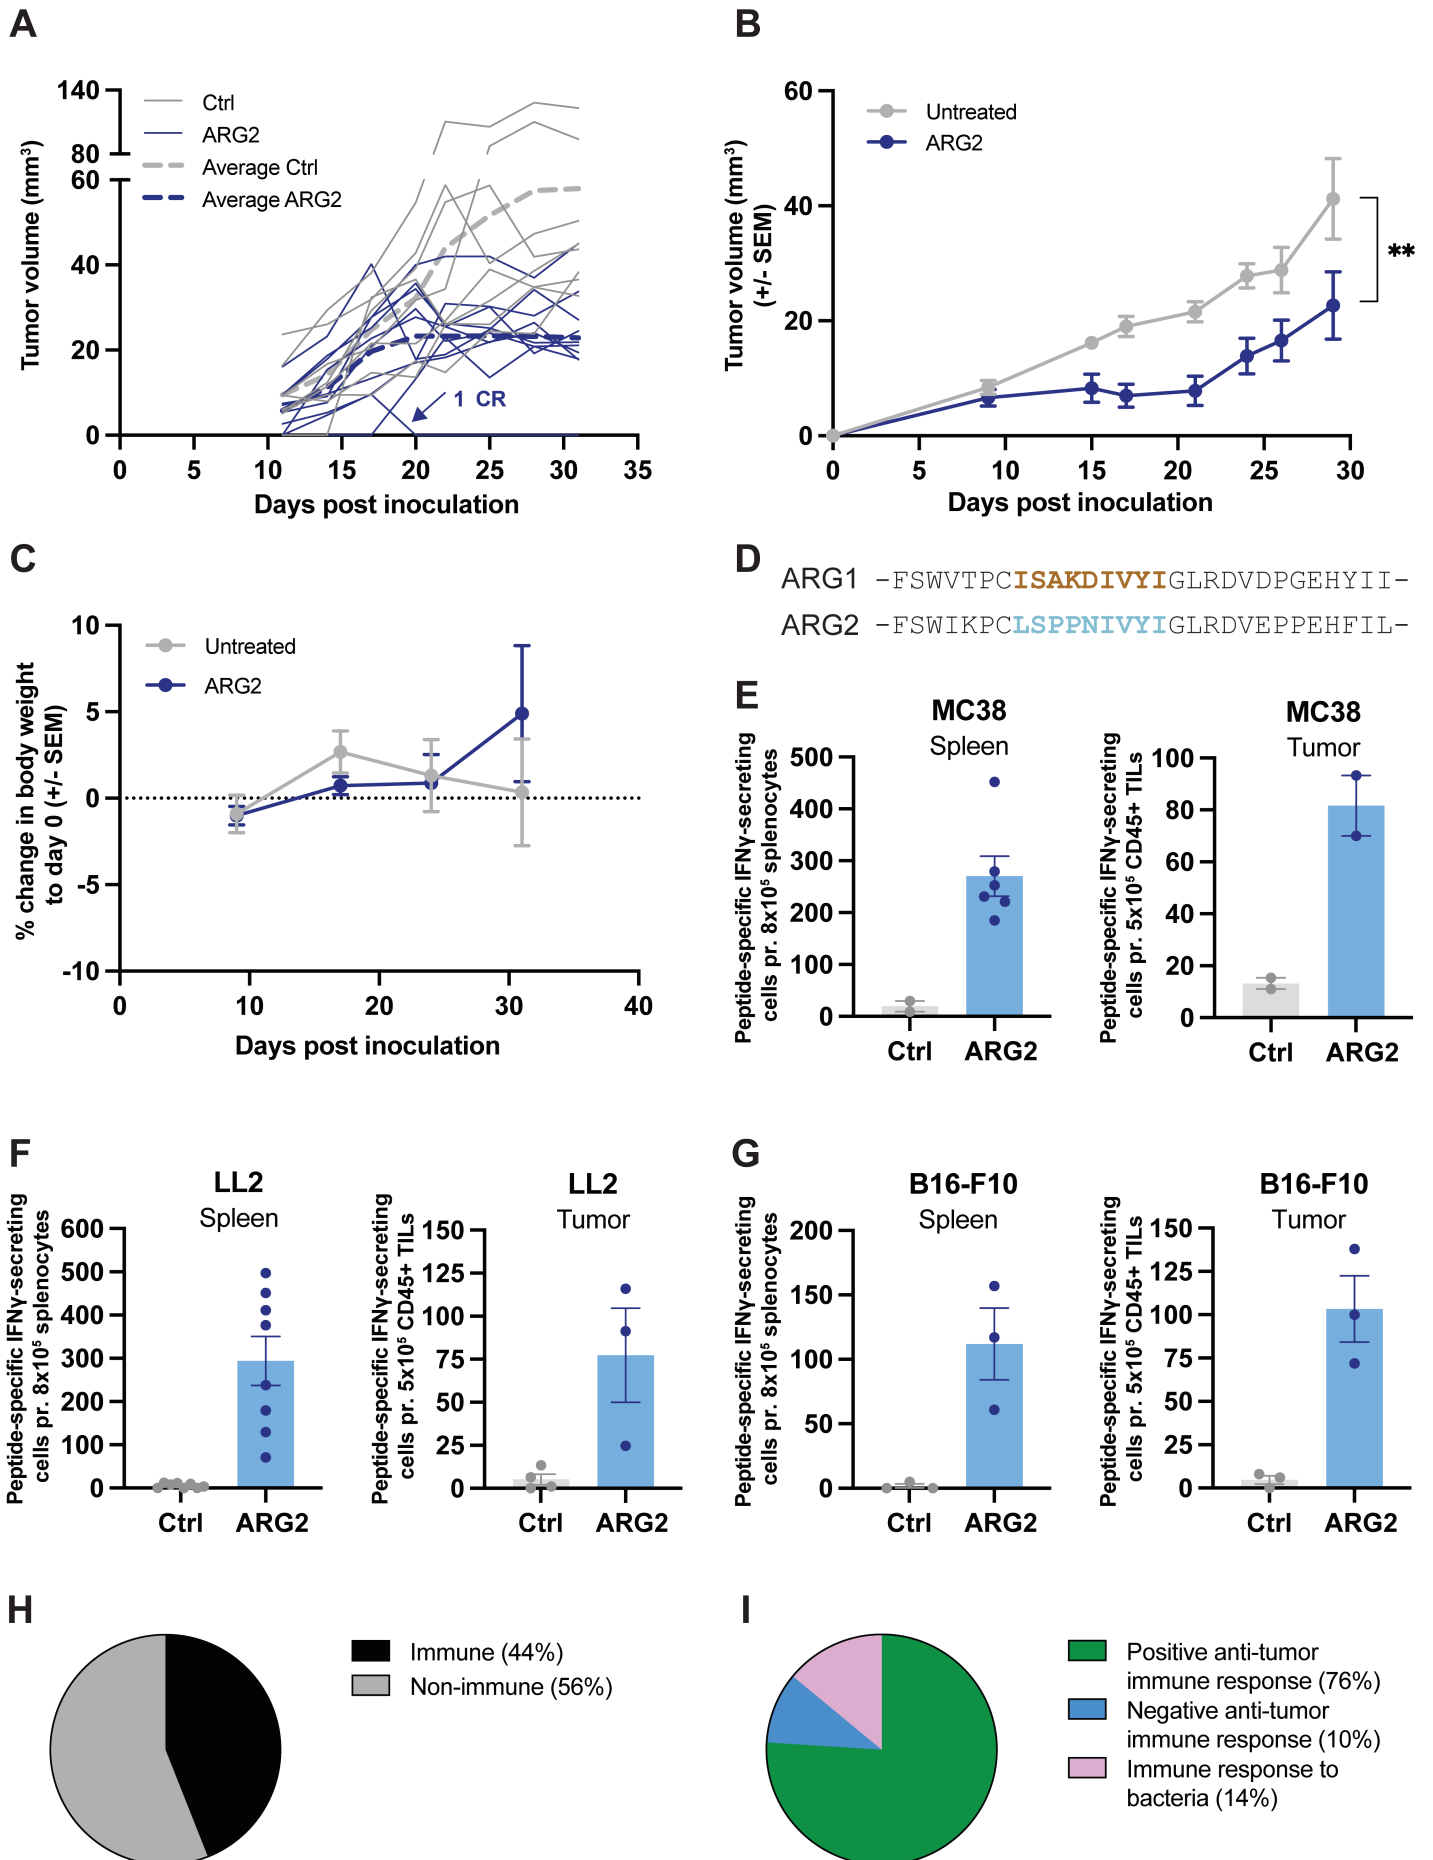

Supplement: jitc-2022-005326supp007.pdf [file jitc-2022-005326supp007.pdf]

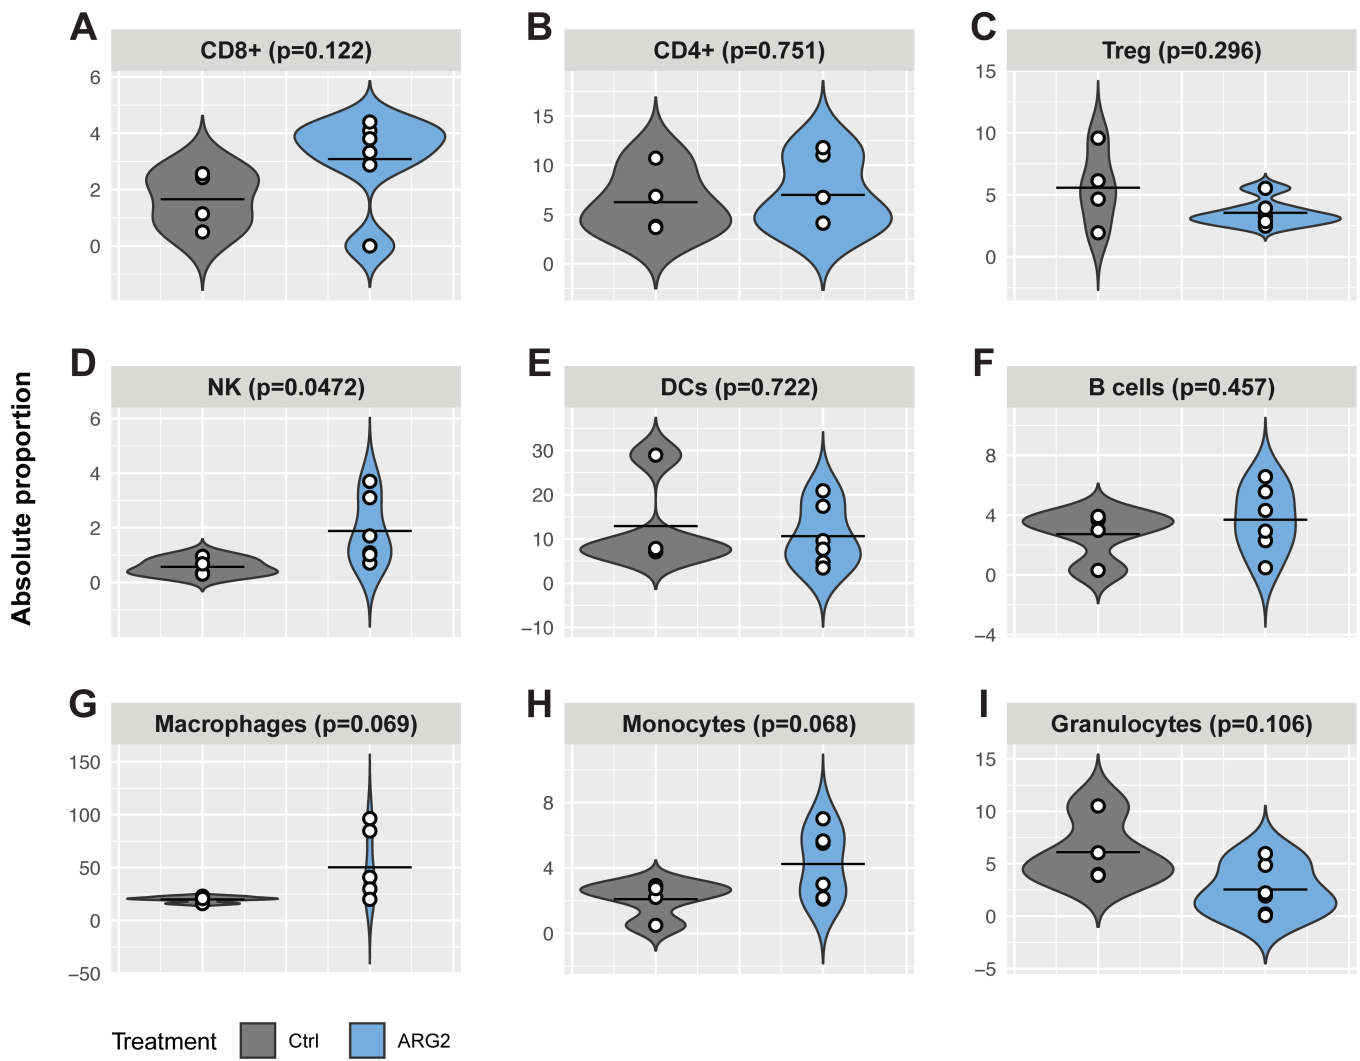

Supplement: jitc-2022-005326supp008.pdf [file jitc-2022-005326supp008.pdf]
